# Supplementary material for: Transcriptome and methylome analysis reveals three cellular origins of pituitary tumors
Source: PubMed Central journal article supplement (PMC7652879; doi:10.1038/s41598-020-76555-8), 2020-11-09
Supplement: 41598_2020_76555_MOESM6_ESM.pdf [file 41598_2020_76555_MOESM6_ESM.pdf]

## **Transcriptome and methylome analysis reveals three cellular origins of pituitary tumors**

Keiko Taniguchi-Ponciano<sup>1</sup>, Sergio Andonegui-Elguera<sup>1</sup>, Eduardo Peña-Martínez<sup>1</sup>, Gloria Silva-Román<sup>1</sup>, Sandra Vela-Patiño<sup>1</sup>, Erick Gomez-Apo<sup>2</sup>, Laura Chavez-Macias<sup>2,3</sup>, Guadalupe Vargas-Ortega<sup>4</sup>, Laura Espinosa-de-los-Monteros<sup>4</sup>, Baldomero Gonzales-Virla<sup>4</sup>, Carolina Perez<sup>4</sup>, Aldo Ferreira-Hermosillo<sup>1,4</sup>, Etual Espinosa-Cardenas<sup>4</sup>, Claudia Ramirez-Renteria<sup>1,4</sup>, Ernesto Sosa<sup>4</sup>, Blas Lopez-Felix<sup>5</sup>, Gerardo Guinto<sup>5</sup>, Daniel Marrero-Rodríguez<sup>1\*</sup> and Moises Mercado<sup>1\*</sup>

1.- CONACyT-Unidad de Investigación Médica en Enfermedades Endocrinas, Hospital de Especialidades, Centro Médico Nacional Siglo XXI, Instituto Mexicano del Seguro Social.

2.- Área de Neuropatología, Servicio de Anatomía Patológica, Hospital General de México Dr. Eduardo Liceaga.

3.- Facultad de Medicina, Universidad Nacional Autónoma de México.

4.- Servicio de Endocrinología, Hospital de Especialidades, Centro Médico Nacional Siglo XXI, Instituto Mexicano del Seguro Social.

5.- Servicio de Neurocirugía, Hospital de Especialidades, Centro Médico Nacional Siglo XXI, Instituto Mexicano del Seguro Social.

\*Corresponding author

Daniel Marrero-Rodríguez, PhD.

CONACyT-Unidad de Investigación Médica en Enfermedades Endocrinas,  
Hospital de Especialidades,  
Centro Médico Nacional Siglo XXI  
Instituto Mexicano del Seguro Social.

Av. Cuauhtémoc 330, Col. Doctores, México D.F. 06720

Phone: +54401021

e-mail: dan.mar57@gmail.com

\*Corresponding author

Moisés Mercado, MD, FRCP(C)

Unidad de Investigación Médica en Enfermedades Endocrinas,  
Hospital de Especialidades,  
Centro Médico Nacional Siglo XXI  
Instituto Mexicano del Seguro Social.

Av. Cuauhtémoc 330, Col. Doctores, México D.F. 06720

Phone: +54401021

e-mail: moises.mercado@endocrinologia.org.mx
